# Supplementary material for: Lightweight, flexible, and conductive PEDOT:PSS coated polyimide nanofibrous aerogels for piezoresistive pressure sensor application
Source: Royal Society of Chemistry journal article supplement (doi:10.1039/d4tc00815d), 2024-01-01
Supplement: d4tc00815d3.pdf [file d4tc00815d3.pdf]

## Supporting Information

### Lightweight, Flexible, and Conductive PEDOT:PSS Coated Polyimide Nanofibrous Aerogel for Piezoresistive Pressure Sensor Application

*Khanh-Van Thi Khuat<sup>1</sup>, Hoan Ngoc Doan<sup>2,3\*</sup>, Phu Phong Vo<sup>3,4</sup>, De Nguyen<sup>1</sup>, Kenji Kinashi<sup>5\*</sup>,  
Wataru Sakai<sup>5</sup>, Naoto Tsutsumi<sup>5</sup>*

*<sup>1</sup>Doctor's Program of Materials Chemistry, Graduate School of Science and Technology, Kyoto  
Institute of Technology, Matsugasaki, Sakyo, Kyoto 606-8585, Japan.*

*<sup>2</sup>School of Biomedical Engineering, International University, Ho Chi Minh City, Vietnam.*

*<sup>3</sup>Vietnam National University, Ho Chi Minh City, Vietnam.*

*<sup>4</sup>Faculty of Chemistry, University of Science, Ho Chi Minh City, Vietnam.*

*<sup>5</sup>Faculty of Materials Science and Engineering, Kyoto Institute of Technology, Matsugasaki,  
Sakyo, Kyoto 606-8585, Japan.*

Corresponding Author Emails: [kinashi@kit.ac.jp](mailto:kinashi@kit.ac.jp), [dnhoan@hcmiu.edu.vn](mailto:dnhoan@hcmiu.edu.vn)

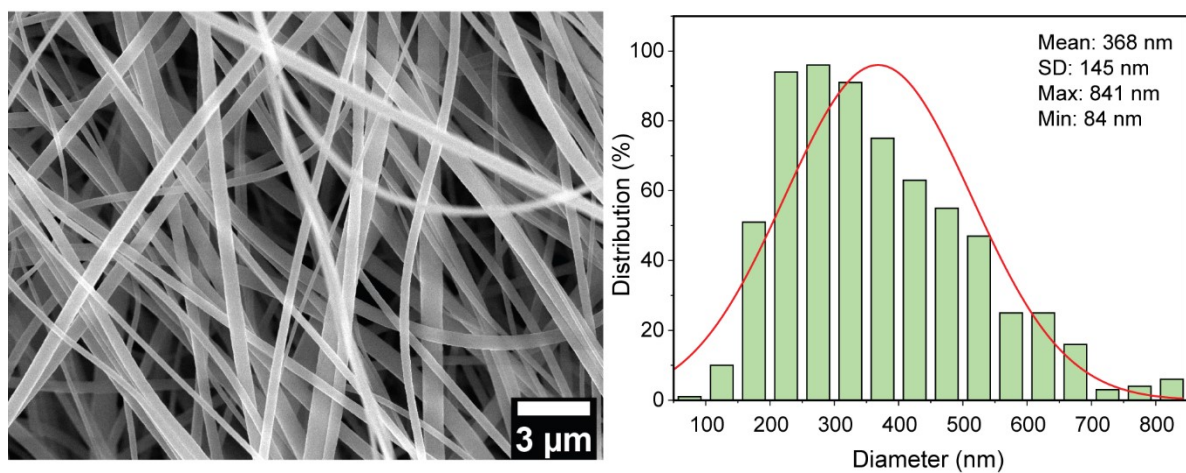

**Figure S1.** FE-SEM image demonstrating cross-linked PI nanofibers with an average diameter of  $368 \pm 145$  nm.

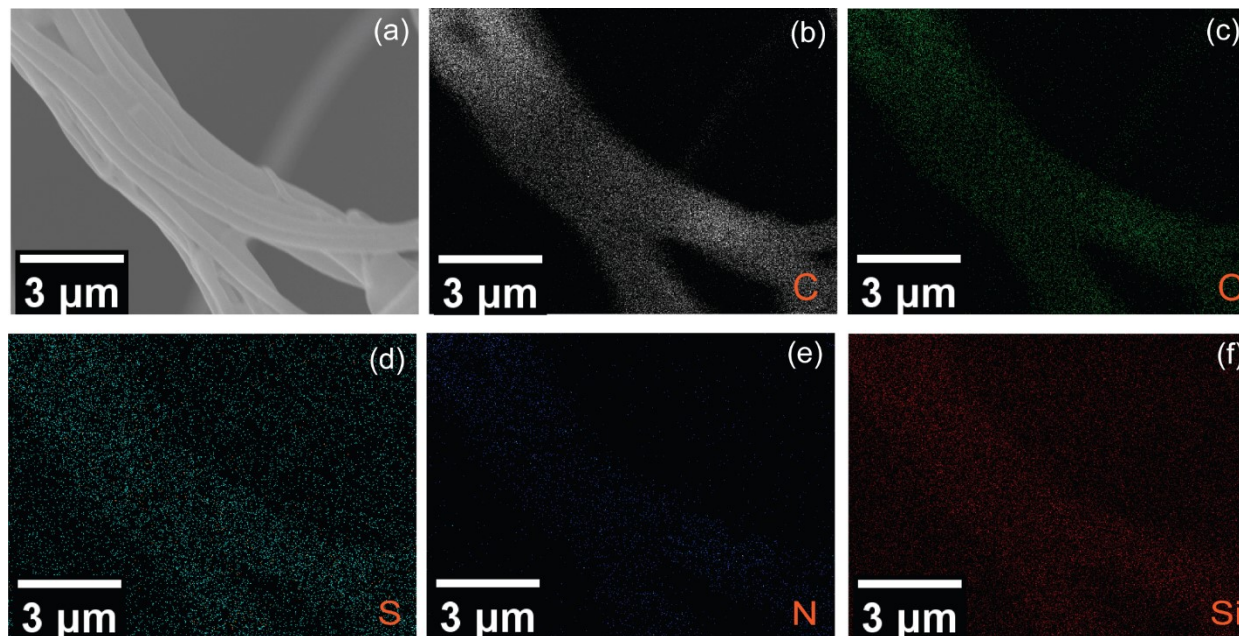

**Figure S2.** EDS mapping of PEDOT:PSS@PI. (a) SEM image of PEDOT:PSS@PI. (b), (c), (d), (e), and (f) are distributions of C, O, S, N, and Si elements of PEDOT:PSS@PI, respectively.

**Table S1.** The analysis data from TGA curves of PiNFA, PEDOT:PSS and PEDOT:PSS @PI.

| Samples          | First decomposition |                 | Second decomposition |                 | Third decomposition |                 | Fourth decomposition |                 |
|------------------|---------------------|-----------------|----------------------|-----------------|---------------------|-----------------|----------------------|-----------------|
|                  | Temperature (°C)    | Weight loss (%) | Temperature (°C)     | Weight loss (%) | Temperature (°C)    | Weight loss (%) | Temperature (°C)     | Weight loss (%) |
| PiNFA            | -                   | -               | 145 ± 1              | 1.4 ± 0.1       | 360 ± 4             | 2.6 ± 0.1       | 548 ± 4              | 37.8 ± 3.9      |
| PEDOT:<br>PSS    | 50 ± 0              | 12.5 ± 1.4      | -                    | -               | 290 ± 0.1           | 41.7 ± 0.4      | -                    | -               |
| PEDOT:<br>PSS@PI | 43 ± 2              | 5.1 ± 1.7       | 161 ± 2              | 1.8 ± 0.2       | 298 ± 8             | 15.0 ± 0.2      | 543 ± 2              | 23.0 ± 0.7      |

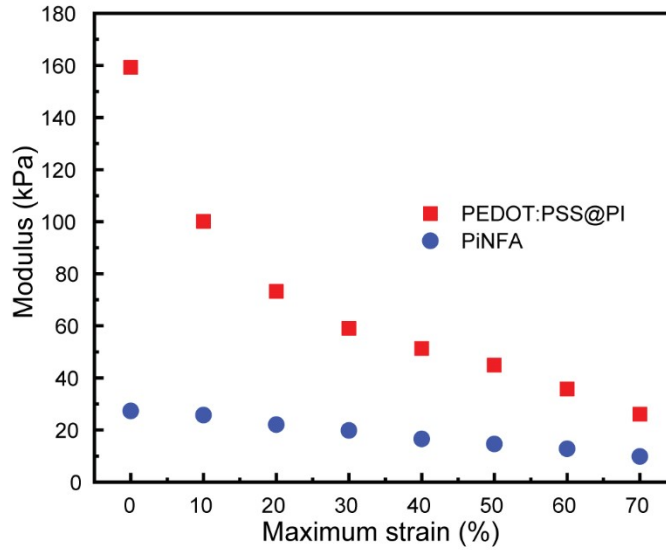

**Figure S3.** A relationship between Young's modulus and maximum strains for PiNFA and PEDOT:PSS@PI.

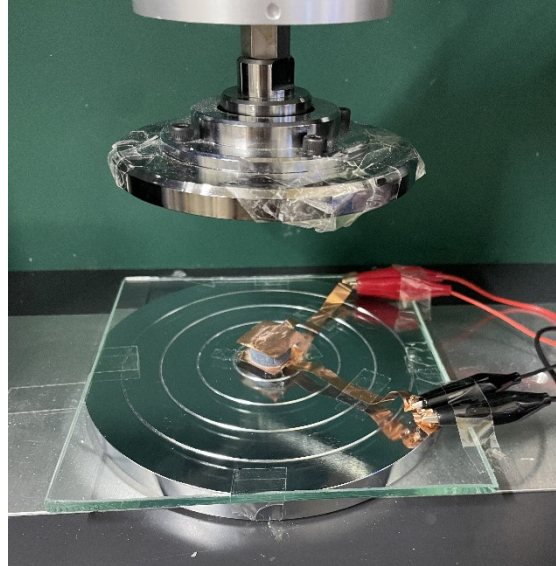

**Figure S4.** Photography of the experiment setup for the measurement of resistance of PEDOT:PSS@PI under compression.

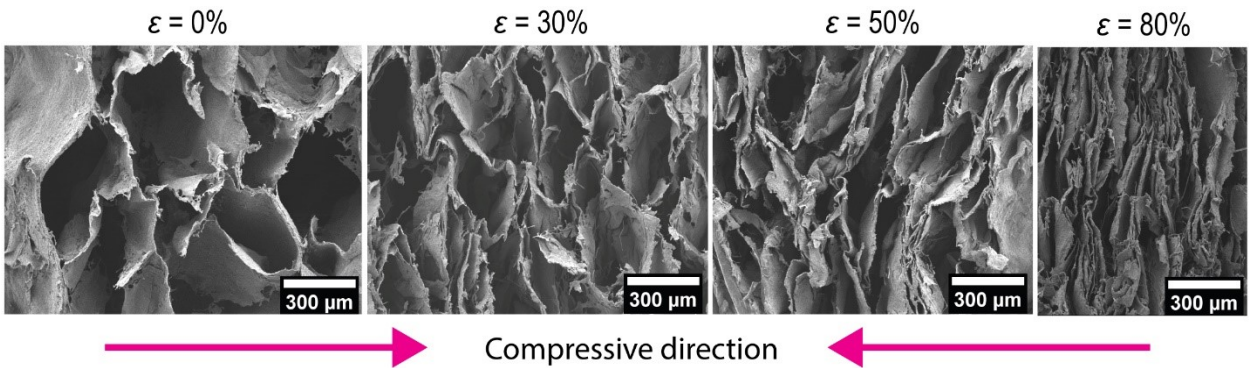

**Figure S5.** FE-SEM images of PEDOT:PSS@PI under different compressive strains of 0, 30, 50, and 80%.

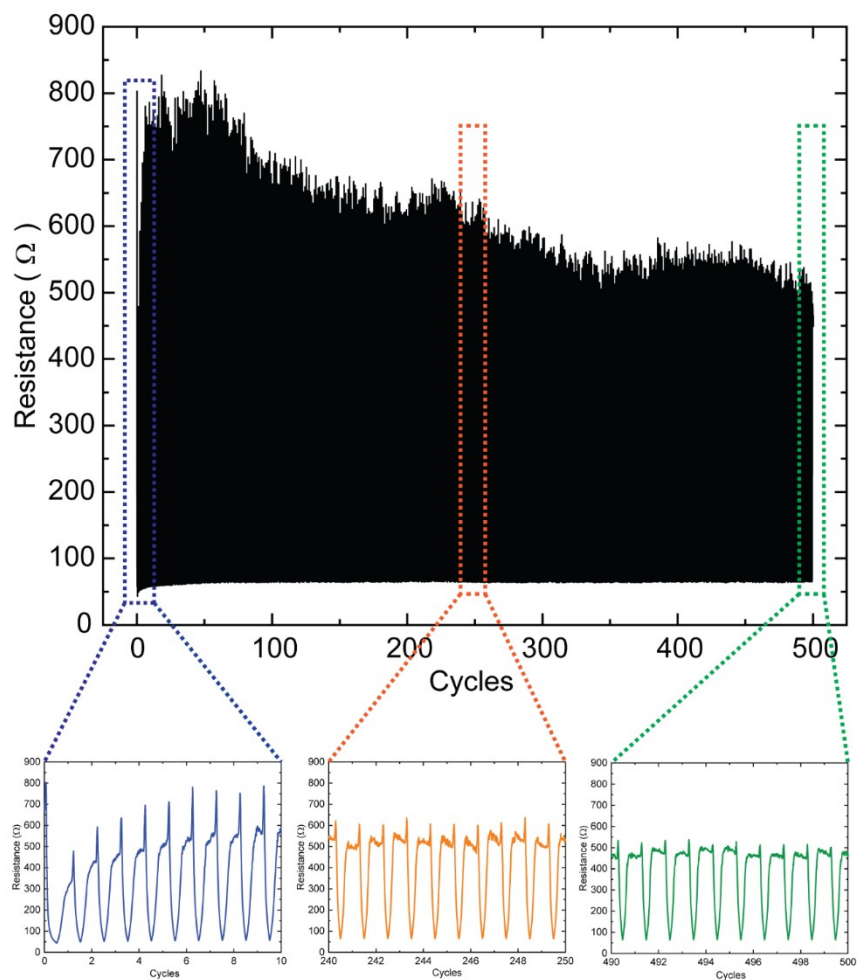

**Figure S6.** (a) The Resistance of the PEDOT:PSS-1@PI under continuous compression and release for 500 cycles at 50% of compressive strain.

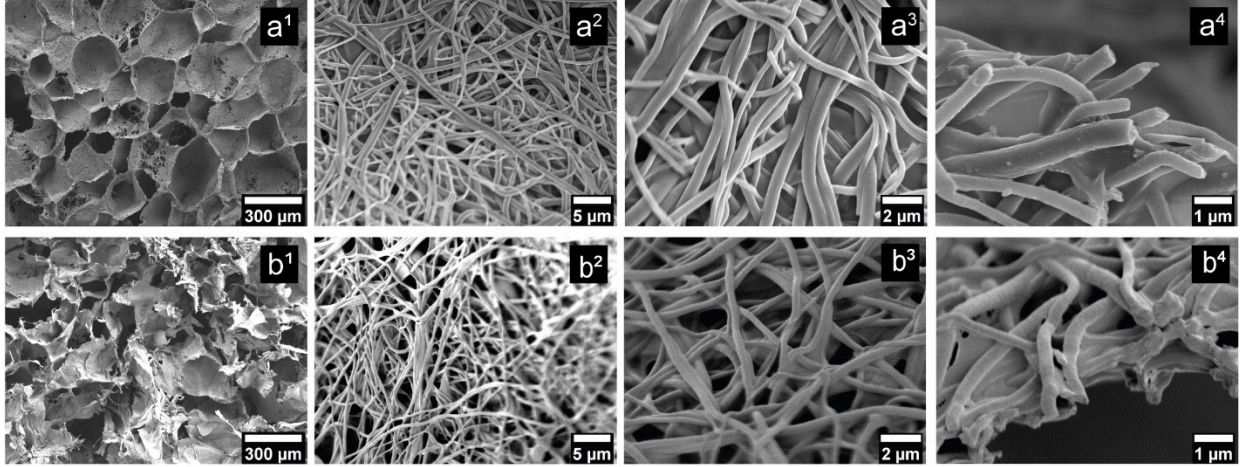

**Figure S7.** FE-SEM images of PEDOT:PSS@PI aerogel: (a<sup>1</sup>-a<sup>4</sup>) before and (b<sup>1</sup>-b<sup>4</sup>) after subjecting them to 500 compression-release cycles for piezoresistive sensing response testing under 50% of compressive strain, captured at different magnifications.

### Mechanical Compression Behavior

Young's modulus was determined by measuring the slope of the stress-strain curves in the elastic region. The compressive stress and strain of samples were calculated using Eq.1 and 2.

$$\text{Compressive stress } (\sigma) = \text{Axial force/Area of sample} = F/\pi r^2 \quad (\text{Eq. S1})$$

$$\text{Compressive Strain } (\varepsilon) = \text{Chang in height /original height} = (h_0-h_i)/h_0 \quad (\text{Eq. S2})$$

Where  $r$  is the radius of the sample,  $h_0$  is the original height, and  $h_i$  is the height at that specific point of the compression test.

The energy loss coefficient can be defined as the ratio between energy dissipation and compressive work. The energy dissipation ( $\Delta D$ ) was the difference between the compressive work or stored energy and the energy released in the unloading process. Expressly,  $W_0$  represents the compressive work determined by the following equation:

$$W = \int_{\varepsilon_1}^{\varepsilon_2} \sigma d\varepsilon \quad (\text{Eq. S3})$$

Where  $\varepsilon_1$  and  $\varepsilon_2$  are the initial and final compressive strain, respectively, and  $\sigma$  is the compressive stress.
